# Supplementary material for: Factors Influencing Physicians’ Continuous Blogging: A Survey
Source: MDPI journal article supplement (doi:10.3390/healthcare9080958), 2021-07-29
Supplement: s1 [file s1]

## Supplementary Material

**Table S1. The measurement properties for constructs**

| Construct     | Measurement item<br>(indicator)                                                                                                                | Reference |
|---------------|------------------------------------------------------------------------------------------------------------------------------------------------|-----------|
| Blogging      | Can present my unique personality                                                                                                              | [1]       |
| self-efficacy | Can attracts my audience' interests and attention                                                                                              |           |
|               | Can make friends through my blog                                                                                                               |           |
| positive      | Improve my reputation                                                                                                                          | [2, 3, 4] |
| performance   | Promote my professional image                                                                                                                  |           |
| outcome       | Increase the number of my patients                                                                                                             |           |
| expectation   | Provide correct medical knowledge<br>showcase my writings, music, pictures, or other works<br>via my blogs                                     |           |
| Positive      | Record my life                                                                                                                                 | [2, 3, 4] |
| personal      | Release my pressure                                                                                                                            |           |
| outcome       | Contact with offline/online friends                                                                                                            |           |
| expectation   | Expand my social network<br>Feel good                                                                                                          |           |
| Negative      | Cause negative consequences                                                                                                                    | [2, 3, 4] |
| outcome       | Cause harmful consequences such as dismissals                                                                                                  |           |
| expectation   | Feel shame if exposing my weakness                                                                                                             |           |
| Satisfaction  | Very dissatisfied/Very satisfied<br>Very displeased/Very pleased<br>Very frustrated/Very contented<br>Absolutely terrible/Absolutely delighted | [5]       |

---

|              |                                                  |     |
|--------------|--------------------------------------------------|-----|
| Continuous   | continue blogging or updating my blog frequently |     |
| intention to | continue blogging to achieve my expectations     | [5] |
| blog         | continue blogging even though I am busy          |     |

---

## References

- [1] Liu X. Online posting anxiety and its influence on blogging: Comparing the US and China. Michigan State University. Department of Telecommunication, Information Studies and Media. 2008.
- [2] Quick B. Why doctors blog. 2008. Available from:  
<http://www.healthcentral.com/diabetes/c/110/23419/doctors-blog>
- [3] Kovic I, Lulic I, Brumini G. Examining the medical blogosphere: an online survey of medical bloggers. *Journal of medical internet research*. 2018; 10(3): e28.
- [4] Liu X. Online posting anxiety: impacts on blogging. *Chinese Journal of Communication*. 2010; 3(2): 202-222.
- [5] Bhattacharjee A, Perols J, Sanford C. Information technology continuance: A theoretic extension and empirical test. *Journal of Computer Information Systems*. 2008; 49(1): 17-26.
